# Supplementary figures and images for: Magnetic recyclable CoFe2O4@PPy prepared by in situ Fenton oxidization polymerization with advanced photo-Fenton performance
Source: Royal Society of Chemistry journal article supplement (doi:10.1039/c9ra09191b), 2020-01-01

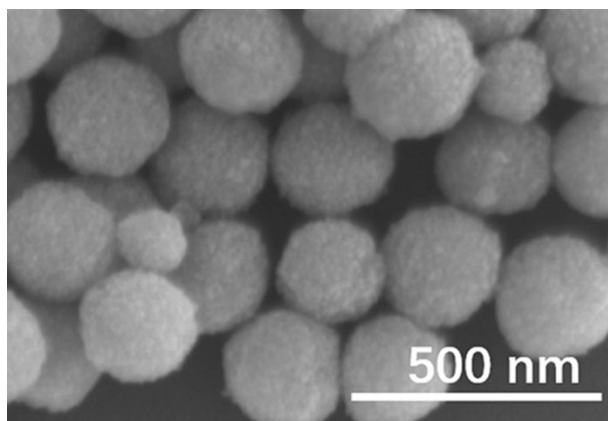

Figure S1

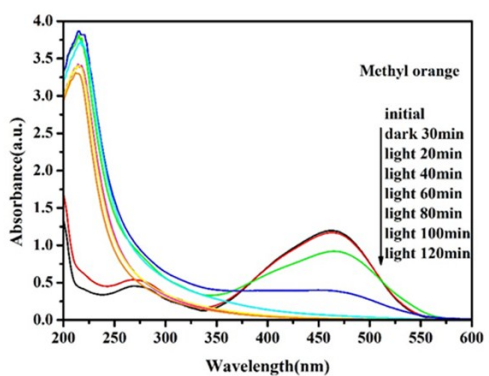

Figure S2

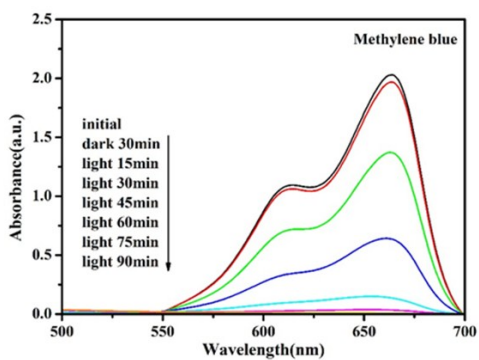

Figure S3

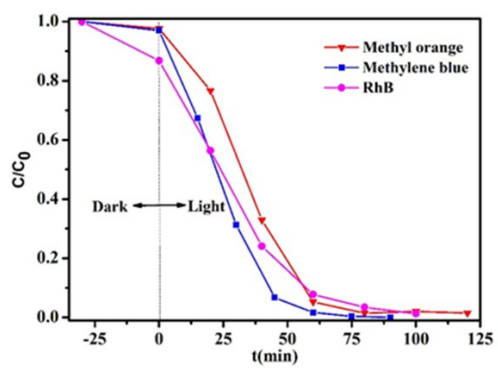

Figure S4

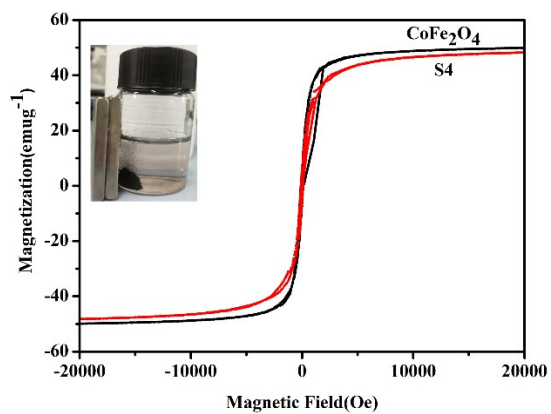

Figure S5

Supplement: c9ra09191b1.pdf [file c9ra09191b1.pdf]
